# Supplementary material for: RIVET: comprehensive graphic user interface for analysis and exploration of genome-wide translatomics data
Source: PubMed Central journal article supplement (PMC6225633; doi:10.1186/s12864-018-5166-z), 2018-11-08
Supplement: 12864_2018_5166_MOESM1_ESM.pdf [file 12864_2018_5166_MOESM1_ESM.pdf]

| gene       | R1_TamR_N | R2_TamR_N | R2_TamR_N | R2_TamR_N | R2_TamR_4I | R2_TamR_4I |
|------------|-----------|-----------|-----------|-----------|------------|------------|
| 1/2-SBSRNA | 29        | 17        | 62        | 48        | 26         | 43         |
| A1BG       | 288       | 191       | 661       | 408       | 126        | 339        |
| A1BG-AS1   | 60        | 26        | 97        | 60        | 30         | 70         |
| A1CF       | 1         | 1         | 5         | 2         | 1          | 3          |
| A2LD1      | 265       | 138       | 449       | 342       | 185        | 435        |
| A2M        | 4         | 19        | 7         | 24        | 17         | 8          |
| A2ML1      | 11        | 8         | 11        | 14        | 7          | 6          |
| A2MP1      | 3         | 6         | 10        | 7         | 2          | 21         |
| A4GALT     | 789       | 659       | 877       | 829       | 771        | 1007       |
| A4GNT      | 0         | 0         | 0         | 0         | 0          | 0          |
| AA06       | 0         | 0         | 0         | 0         | 0          | 0          |
| AAA1       | 0         | 0         | 0         | 1         | 0          | 0          |
| AAAS       | 4208      | 3089      | 1226      | 2628      | 3426       | 1654       |
| AACS       | 2178      | 1939      | 1099      | 1691      | 2052       | 1333       |
| AACSP1     | 14        | 5         | 7         | 10        | 7          | 7          |
| AADAC      | 0         | 0         | 1         | 0         | 0          | 1          |
| AADACL2    | 0         | 0         | 0         | 0         | 0          | 0          |
| AADACL3    | 0         | 0         | 1         | 0         | 0          | 0          |
| AADACL4    | 0         | 0         | 0         | 0         | 0          | 0          |
| AADAT      | 1148      | 992       | 1025      | 1038      | 835        | 957        |
| AAGAB      | 5841      | 5835      | 3583      | 4703      | 7144       | 4162       |
| AAK1       | 781       | 1178      | 883       | 1142      | 1309       | 996        |
| AAMP       | 12820     | 12382     | 3648      | 9541      | 13368      | 4618       |
| AANAT      | 16        | 12        | 15        | 14        | 9          | 26         |
| AARS       | 13567     | 10864     | 3892      | 10176     | 14340      | 5670       |
| AARS2      | 2152      | 2060      | 1822      | 2316      | 2355       | 1844       |
| AARSD1     | 1665      | 1412      | 947       | 1369      | 1482       | 965        |
| AASDH      | 684       | 479       | 631       | 587       | 510        | 603        |
| AASDHPPT   | 3967      | 3446      | 2325      | 2748      | 3612       | 2067       |
| AASS       | 67        | 98        | 104       | 111       | 122        | 106        |
| AATF       | 4292      | 3708      | 1169      | 2881      | 4491       | 1729       |
| AATK       | 535       | 639       | 653       | 718       | 755        | 910        |
| AATK-AS1   | 10        | 8         | 9         | 13        | 9          | 15         |
| ABAT       | 2308      | 3031      | 1429      | 2717      | 2606       | 1318       |
| ABCA1      | 0         | 2         | 2         | 4         | 1          | 1          |
| ABCA10     | 5         | 8         | 23        | 13        | 14         | 30         |
| ABCA11P    | 132       | 133       | 297       | 187       | 92         | 289        |
| ABCA12     | 1699      | 1889      | 1373      | 1769      | 2843       | 1853       |
| ABCA13     | 19        | 13        | 19        | 24        | 19         | 16         |
| ABCA17P    | 72        | 50        | 117       | 62        | 61         | 105        |
| ABCA2      | 3618      | 6439      | 4436      | 6783      | 7204       | 5893       |
| ABCA3      | 5772      | 6099      | 2567      | 5486      | 8723       | 4296       |
| ABCA4      | 20        | 27        | 8         | 13        | 52         | 49         |
| ABCA5      | 272       | 380       | 565       | 441       | 416        | 608        |
