# Supplementary material for: RIVET: comprehensive graphic user interface for analysis and exploration of genome-wide translatomics data
Source: PubMed Central journal article supplement (PMC6225633; doi:10.1186/s12864-018-5166-z), 2018-11-08
Supplement: 12864_2018_5166_MOESM2_ESM.pdf [file 12864_2018_5166_MOESM2_ESM.pdf]

# Additional Figure

A

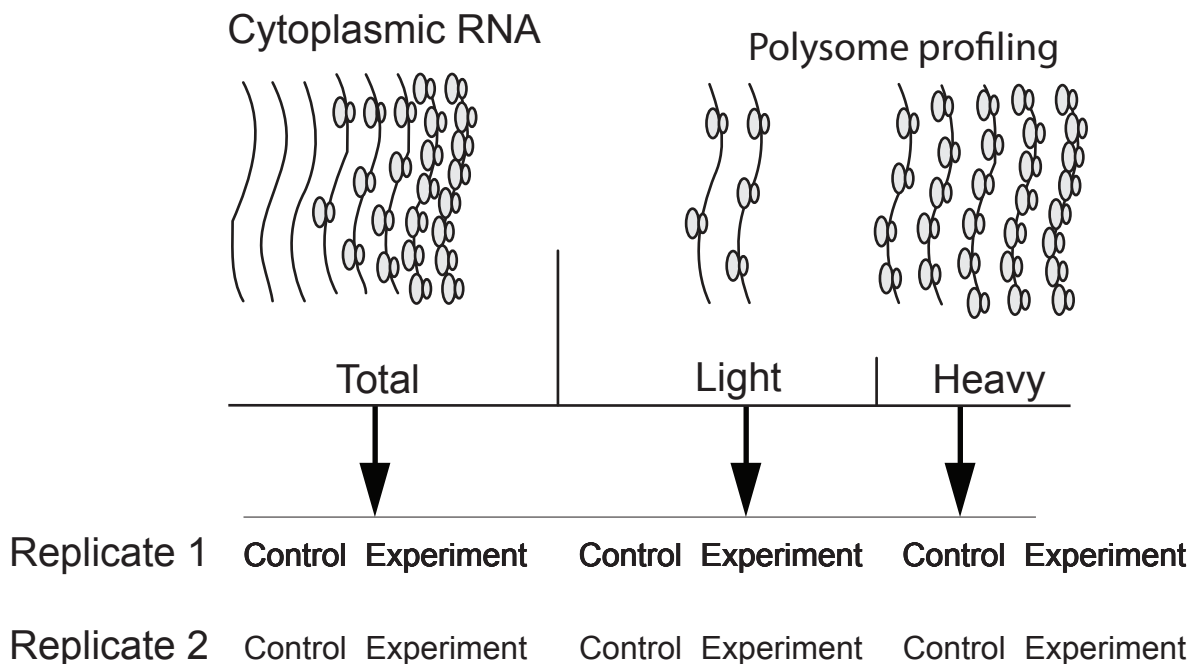

B

## Uploading Files

Try a Sample Dataset!

**Choose CSV File**

BROWSE... geter\_et\_al.txt

Upload complete

**Separator**

Tab

Comma

RESET FORM

**RNAseq or microarray**

Microarray

RNA seq

**Statistical Method**

EdgeR

Limma

**3** How many polysome fractions?

2

PLOT SAMPLES

**Sample Labels**

**Control label**

NS

**Experiment label** 1

E4

**Transcription**

**Control**

R2\_TamR\_NS\_T R1\_TamR\_NS\_T

**Experiment** 2

R2\_TamR\_4E\_T R1\_TamR\_4E\_T

**Translation**

**Control**

R2\_TamR\_NS\_HD R1\_TamR\_NS\_HD

**Experiment**

R2\_TamR\_4E\_HD R1\_TamR\_4E\_HD Heavy

**Experiment**

R2\_TamR\_4E\_LD R1\_TamR\_4E\_LD Light
